# Supplementary material
Source: publisher site journal article supplement (https://www.spandidos-publications.com/2209/downloadSupplementary)

Figure S1. IF staining assays. MCF-7 cells were treated with narasin for 24 h and expression of (A) E-cadherin and (B) N-cadherin were determined using IF staining. IF analysis of (C) SMAD3, (D) E-cadherin and (E) N-cadherin expression in MCF-7 cells following narasin treatment with TGF- $\beta$  stimulation. IF analysis of (F) STAT3, (G) E-cadherin and (H) N-cadherin expression in MCF-7 cells following narasin treatment with IL-6 stimulation. \*P<0.05, \*\*P<0.01. IF, immunofluorescence.

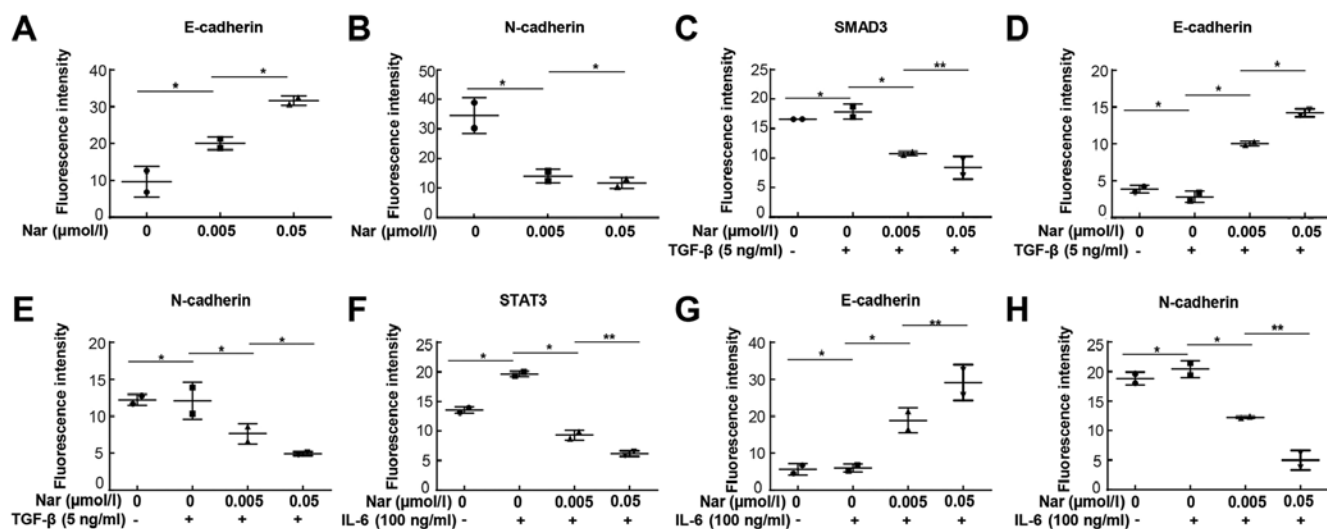

Figure S2. Narasin-mediated suppression of ER<sup>+</sup> BC xenograft growth *in vivo* was associated with decreased neovascularization. CD31 immunohistochemical staining analysis revealed that narasin inhibited angiogenesis in human ER<sup>+</sup> BC xenografts. BC, breast cancer; ER<sup>+</sup>, estrogen receptor-positive.

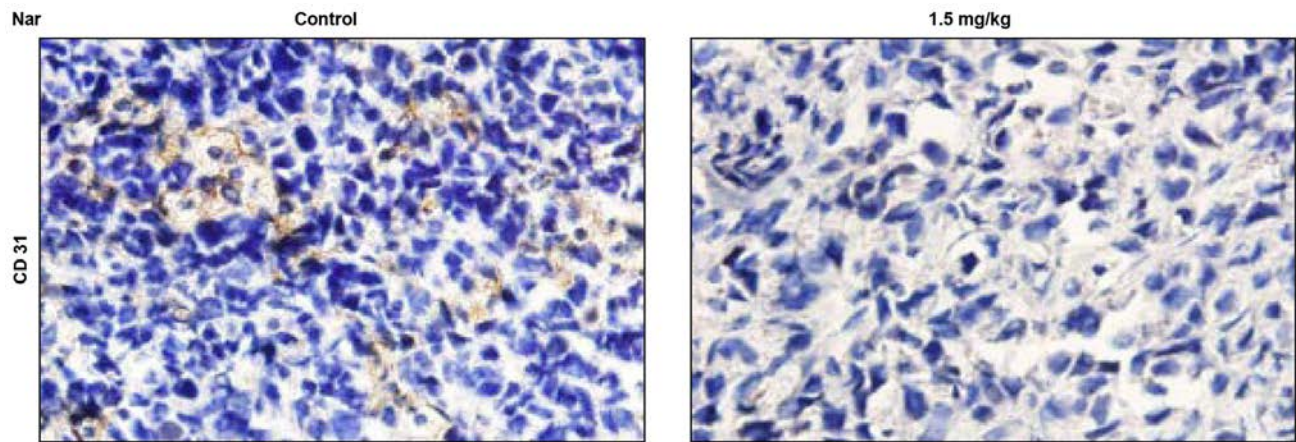

Supplement: Supplementary file 1 [file downloadSupplementary]
